# Supplementary material for: Angiotensin Converting Enzyme 2 (ACE2) Expression in the Aged Brain and Visual System
Source: PubMed Central journal article supplement (PMC8580311), 2021-09-30
Supplement: NIHMS1750170-supplement-1.pdf [file NIHMS1750170-supplement-1.pdf]

## SUPPLEMENTARY FILES

**Supplementary File 1A:** Standard curve of human ACE2 as analyzed using a human ACE2 ELISA Kit (ab235649; Abcam, Cambridge MA, USA; ELISA assay sensitivity is ~ 1052 pg/ml; range: 1.5 ng/ml - 255 ng/ml); based on the standard curve, mean ACE2 protein concentrations in the eye and brain ranged from approximately 2-16 ng/ml; ACE2 protein concentrations in the human heart and kidney have been previously reported to range between respectively, ~ 30 and ~ 100 ng/ml; <https://www.abcam.com/human-ace2-elisa-kit-ab235649.html>.

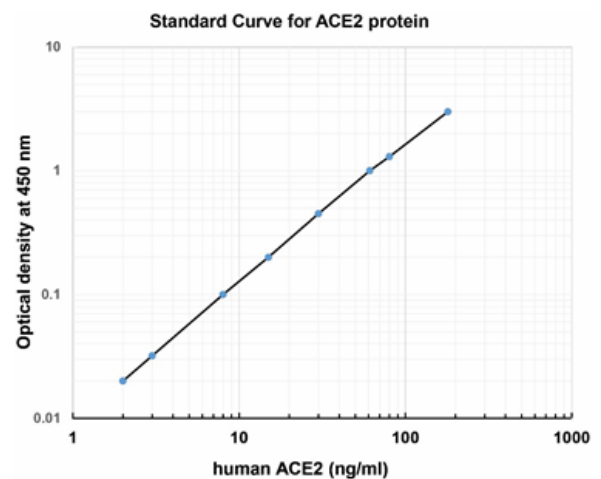

## Supplementary File 1B

| SUPPLEMENTARY FILE 1B - ELISA RESULTS - RAW DATA<br>(these MEAN +/- 1 S.D. data are graphed in Figure 2 in this paper)<br>ACE2 RECEPTOR PROTEIN IN THE VISUAL SYSTEM<br>(relative signal strength) |         |         |         |      |        |
|----------------------------------------------------------------------------------------------------------------------------------------------------------------------------------------------------|---------|---------|---------|------|--------|
|                                                                                                                                                                                                    | ELISA 1 | ELISA 2 | ELISA 3 | MEAN | 1 S.D. |
| whole brain                                                                                                                                                                                        | 3.5     | 6       | 5.5     | 5    | 1.08   |
| cerebral cortex                                                                                                                                                                                    | 6       | 9.9     | 8.4     | 8.1  | 1.61   |
| occipital lobe                                                                                                                                                                                     | 14.1    | 11      | 10      | 11.7 | 1.7    |
| temporal lobe                                                                                                                                                                                      | 5.7     | 9       | 7.8     | 7.5  | 1.36   |
| pons                                                                                                                                                                                               | 13.5    | 15.9    | 18.6    | 16   | 2.08   |
| cerebellum                                                                                                                                                                                         | 4.1     | 3.8     | 5       | 4.3  | 0.51   |
| optic nerve                                                                                                                                                                                        | 9.1     | 10.8    | 11.9    | 10.6 | 1.15   |
| whole eye                                                                                                                                                                                          | 6.3     | 8.1     | 8.7     | 7.7  | 1.02   |
| whole retina                                                                                                                                                                                       | 9.9     | 7.4     | 9.4     | 8.9  | 1.08   |
| corneal epithelial cells                                                                                                                                                                           | 1.7     | 1.5     | 1.3     | 1.5  | 0.16   |
| retinal pigment epithelial cells                                                                                                                                                                   | 9.5     | 11.5    | 13.5    | 11.5 | 1.63   |
| non-pigmented ciliary epithelial cells                                                                                                                                                             | 5.4     | 6       | 6.9     | 6.1  | 0.62   |
| trabecular meshwork cells                                                                                                                                                                          | 4.4     | 4       | 5.1     | 4.5  | 0.45   |
| ocular choroid fibroblasts                                                                                                                                                                         | 6.4     | 8.9     | 7.8     | 7.7  | 1.02   |
